# Supplementary material
Source: Research Square preprint supplement (doi:10.21203/rs.3.rs-10224385/v1)
Supplement: Supplementary file 1 [file 02ecfc2723cbc13a37f3f410.docx]

**Appendix**

1. **ADF test result for monthly inflation rate at levels.**

1. **ADF test result for repo rate at first difference.**

1. **ADF test results for residuals of the ARDL Regression at levels.**

1. **Toda-Yamamoto Causality test result.**

1. **ARDL (4,1) model results.**

1. **ARDL Bounds Cointegration test results.**

1. **Error Correction Mechanism (ECM) results.**

1. **Serial correlation LM test result.**

1. **Breusch-Pagan-Godfrey test results.**

1. **Ramsey RESET result.**
